# Supplementary material
Source: ML conference proceedings conference paper supplement (https://openreview.net/forum?id=NoeLQU4J2O)
Supplement: supplementary_material [file attachment]

## 1 A Implementation Details

2 We have developed a library based on PyTorch, which includes a native CUDA implementation.  
3 In order to promote transparency and reproducibility, we will provide the source code for our  
4 implementation on GitHub. However, to comply with the double-blind review process, we have  
5 omitted the link to the GitHub repository in this submission. Instead, you can find the complete  
6 source code within the provided zip file for this paper.

## 7 B Extended Tables: Experimental Results

8 In this section, we present extended tables that include additional experimental results for the UCI  
9 and MNIST MLPerf Tiny datasets. The tables provide average accuracies, standard deviations, and  
10 training times for the selected hyperparameters. All training times were measured using an Nvidia  
11 GTX-1080ti GPU.

12 **Hyperparameters**  $n$  refers to the addressing length of RAM neurons.  $K$  is the number of hash  
13 functions used.  $L$  is the filter length.  $H$  is the number of hidden neurons ( $N * C$  in the case for  
14 WNNs, where  $N$  is the number of RAMs within a discriminator and  $C$  is the number of classes),  $p$  is  
15 the dropout probability, and  $\tau$  is the softmax temperature.

Table 1: Extend results for SoonWISARD, BTHOWeN, Diff Logic Net, FINN, and DeepShift on the Ecoli Dataset.

| Ecoli          | Size    | Acc.  | Std  | Time Train | Hyperparameters                      |
|----------------|---------|-------|------|------------|--------------------------------------|
| SoonWiSARD     | 0.74KiB | 81.4% | 5.0% | 4s         | $n=4, K=2, L=9, H=84, p=0.5, \tau=1$ |
| BTHOWeN        | 0.87KiB | 87.5% | -    | -          | $n=10, K=2, L=128, H=10$             |
| Diff Logic Net | 0.87KiB | 79.3% | 3.6% | 5s         | $H=1792, p=0.0, \tau=1/0.1$          |
| FINN           | 0.88KiB | 68.9% | 7.0% | 3s         | $H=447, p=0.2$                       |
| DeepShift      | 0.88KiB | 43.6% | 1.4% | 7s         | $H=64, p=0.2$                        |

Table 2: Extend results for SoonWISARD, BTHOWeN, Diff Logic Net, FINN, and DeepShift on the Iris Dataset.

| Iris           | Size    | Acc.  | Std   | Time Train | Hyperparameters                      |
|----------------|---------|-------|-------|------------|--------------------------------------|
| SoonWiSARD     | 0.23KiB | 98.3% | 6.0%  | 1s         | $n=4, K=2, L=9, H=72, p=0.5, \tau=1$ |
| BTHOWeN        | 0.28KiB | 98.0% | -     | -          | $n=2, K=1, L=128, H=6$               |
| Diff Logic Net | 0.28KiB | 98.3% | 3.1%  | 1s         | $H=575, p=0.0, \tau=1/0.1$           |
| FINN           | 0.29KiB | 69.2% | 16.9% | 1s         | $H=287, p=0.2$                       |
| DeepShift      | 0.30KiB | 33.3% | 17.2% | 1s         | $H=32, p=0.2$                        |

Table 3: Extend results for SoonWISARD, BTHOWeN, Diff Logic Net, FINN, and DeepShift on the Letter Dataset.

| Letter         | Size     | Acc.  | Std  | Time Train | Hyperparameters                          |
|----------------|----------|-------|------|------------|------------------------------------------|
| SoonWiSARD     | 76.23KiB | 96.0% | 0.8% | 72s        | $n=11, K=2, L=16, H=1496, p=0.5, \tau=1$ |
| BTHOWeN        | 78.00KiB | 90.0% | -    | -          | $n=20, K=4, L=2048, H=12$                |
| Diff Logic Net | 78.00KiB | 90.9% | 0.7% | 85s        | $H=159744, p=0.0, \tau=1/0.1$            |
| FINN           | 78.00KiB | 4.79% | 0.3% | 96s        | $H=14859, p=0.2$                         |
| DeepShift      | 78.00KiB | 19.2% | 1.6% | 68s        | $H=2636, p=0.2$                          |

Table 4: Extend results for SoonWiSARD, BTHOWeN, Diff Logic Net, FINN, and DeepShift on the SatImage Dataset.

| SatImage       | Size    | Acc.  | Std  | Time Train | Hyperparameters                        |
|----------------|---------|-------|------|------------|----------------------------------------|
| SoonWiSARD     | 8.54KiB | 92.5% | 0.8% | 20s        | n=8, K=2, L=9, H=1295, p=0.5, $\tau=1$ |
| BTHOWeN        | 9.00KiB | 88.0% | -    | -          | n=12, K=4, L=512, H=24                 |
| Diff Logic Net | 9.25KiB | 90.2% | 1.1% | 19s        | H=18432, p=0.0, $\tau=1/0.1$           |
| FINN           | 9.00KiB | 30.8% | 0.0% | 32s        | H=1714, p=0.2                          |
| DeepShift      | 9.50KiB | 48.0% | 1.8% | 23s        | H=303, p=0.2                           |

Table 5: Extend results for SoonWiSARD, BTHOWeN, Diff Logic Net, FINN, and DeepShift on the Vehicle Dataset.

| Vehicle        | Size    | Acc.  | Std  | Time Train | Hyperparameters                        |
|----------------|---------|-------|------|------------|----------------------------------------|
| SoonWiSARD     | 2.25KiB | 78.3% | 4.3% | 3s         | n=6, K=2, L=32, H=144, p=0.5, $\tau=1$ |
| BTHOWeN        | 2.25KiB | 76.2% | -    | -          | n=16, K=3, L=256, H=18                 |
| Diff Logic Net | 2.25KiB | 73.5% | 4.0% | 3s         | H=4608, p=0.0, $\tau=1/0.1$            |
| FINN           | 2.30KiB | 27.2% | 2.8% | 5s         | H=801, p=0.2                           |
| DeepShift      | 2.50KiB | 28.3% | 0.7% | 4s         | H=128, p=0.2                           |

Table 6: Extend results for SoonWiSARD, BTHOWeN, Diff Logic Net, FINN, and DeepShift on the Vowel Dataset.

| Vowel          | Size    | Acc.  | Std  | Time Train | Hyperparameters                       |
|----------------|---------|-------|------|------------|---------------------------------------|
| SoonWiSARD     | 3.43KiB | 94.0% | 2.9% | 3s         | n=6, K=4, L=64, H=44, p=0.5, $\tau=1$ |
| BTHOWeN        | 3.44KiB | 90.0% | -    | -          | n=15, K=4, L=256, H=10                |
| Diff Logic Net | 3.44KiB | 74.9% | 4.1% | 3s         | H=7045, p=0.0, $\tau=1/0.1$           |
| FINN           | 3.50KiB | 17.7% | 3.0% | 6s         | H=1280, p=0.2                         |
| DeepShift      | 3.50KiB | 8.4%  | 1.8% | 4s         | H=203, p=0.2                          |

Table 7: Extend results for SoonWiSARD, BTHOWeN, Diff Logic Net, FINN, and DeepShift on the Wine Dataset.

| Wine           | Size    | Acc.  | Std   | Time Train | Hyperparameters                      |
|----------------|---------|-------|-------|------------|--------------------------------------|
| SoonWiSARD     | 0.23KiB | 93.3% | 4.2%  | 1s         | n=2, K=2, L=4, H=36, p=0.5, $\tau=1$ |
| BTHOWeN        | 0.42KiB | 98.3% | -     | -          | n=13, K=3, L=128, H=9                |
| Diff Logic Net | 0.42KiB | 86.0% | 4.7%  | 1s         | H=864, p=0.0, $\tau=1/0.1$           |
| FINN           | 0.42KiB | 14.0% | 2.0%  | 1s         | H=203, p=0.2                         |
| DeepShift      | 0.42KiB | 27.3% | 15.6% | 1s         | H=20, p=0.2                          |

Table 8: Extend results for SoonWiSARD, BTHOWeN, Diff Logic Net, FINN, and DeepShift on the MNIST Dataset.

| MNIST                   | Size   | Acc.  | Std  | Time Train | Hyperparameters                               |
|-------------------------|--------|-------|------|------------|-----------------------------------------------|
| SoonWiSARD (small)      | 23KiB  | 97.2% | 0.3% | 8m         | n=14, K=2, L=16 H=11776, p=0.5, $\tau=1/0.1$  |
| SoonWiSARD (medium)     | 98KiB  | 98.0% | 0.2% | 8m         | n=14, K=2, L=16 H=50176, p=0.5, $\tau=1/0.03$ |
| SoonWiSARD (large)      | 186KiB | 98.2% | 0.2% | 8m         | n=14, K=2, L=16 H=95232, p=0.5, $\tau=1/0.03$ |
| BTHOWeN (small)         | 35KiB  | 92.8% | 0.2% | -          | n=28, K=2, L=512, H=560                       |
| BTHOWeN (medium)        | 70KiB  | 93.4% | 0.2% | -          | n=28, K=2, L=1024, H=560                      |
| BTHOWeN (large)         | 210KiB | 94.3% | 0.2% | -          | n=28, K=2, L=2048, H=840                      |
| Diff Logic Net (small)  | 23KiB  | 94.1% | 0.5% | 7m         | H=45000, p=0.0, $\tau=1/0.1$                  |
| Diff Logic Net (medium) | 98KiB  | 95.2% | 0.3% | 12m        | H=20000, p=0.0, $\tau=1/0.03$                 |
| Diff Logic Net (large)  | 188KiB | 95.3% | 0.4% | 20m        | H=384000, p=0.0, $\tau=1/0.03$                |
| FINN (small)            | 23KiB  | 94.6% | 0.2% | 12m        | H=230, p=0.2                                  |
| FINN (medium)           | 98KiB  | 97.0% | 0.2% | 12m        | H=1010, p=0.2                                 |
| FINN (large)            | 188KiB | 97.7% | 0.2% | 12m        | H=1940, p=0.2                                 |
| DeepShift (small)       | 23KiB  | 96.8% | 0.2% | 8m         | H=45, p=0.2                                   |
| DeepShift (medium)      | 98KiB  | 98.1% | 0.2% | 8m         | H=200, p=0.2                                  |
| DeepShift (large)       | 188KiB | 98.4% | 0.2% | 8m         | H=385, p=0.2                                  |

Table 9: Extend results for SoonWiSARD, BTHOWeN, Diff Logic Net, FINN, and DeepShift on the CIFAR-10 Dataset.

| CIFAR-10                | Size   | Acc.   | Std  | Time Train | Hyperparameters                                |
|-------------------------|--------|--------|------|------------|------------------------------------------------|
| SoonWiSARD (small)      | 20KiB  | 49.7%  | 1.3% | 8m         | n=6, K=2, L=4, H=40960, p=0.5, $\tau=1/0.03$   |
| SoonWiSARD (medium)     | 240KiB | 55.6%  | 1.1% | 28m        | n=6, K=2, L=4, H=491520, p=0.5, $\tau=1/0.01$  |
| SoonWiSARD (large)      | 620KiB | 57.3%  | 0.8% | 76m        | n=6, K=2, L=4, H=1269760, p=0.5, $\tau=1/0.01$ |
| BTHOWeN (small)         | 32KiB  | 14.06% | 1.2% | -          | n=30, K=2, L=128, H=2050                       |
| BTHOWeN (medium)        | 192KiB | 36.47% | 0.6% | -          | n=10, K=2, L=256, H=6140                       |
| BTHOWeN (large)         | 384KiB | 37.72% | 0.4% | -          | n=10, K=2, L=512, H=6140                       |
| Diff Logic Net (small)  | 24KiB  | 48.2%  | 0.0% | 8m         | H=49000, p=0.0, $\tau=1/0.03$                  |
| Diff Logic Net (medium) | 250KiB | 50.6%  | 0.0% | 32m        | H=512000, p=0.0, $\tau=1/0.01$                 |
| Diff Logic Net (large)  | 625KiB | 52.3%  | 0.0% | 84m        | H=1280000, p=0.0, $\tau=1/0.01$                |
| FINN (small)            | 24KiB  | 40.0%  | 0.8% | 16m        | H=64, p=0.2                                    |
| FINN (medium)           | 250KiB | 46.5%  | 0.7% | 16m        | H=665, p=0.2                                   |
| FINN (large)            | 625KiB | 48.0%  | 0.6% | 16m        | H=1660, p=0.2                                  |
| DeepShift (small)       | 24KiB  | 40.3%  | 1.9% | 12m        | H=13, p=0.2                                    |
| DeepShift (medium)      | 250KiB | 53.0%  | 1.2% | 12m        | H=133, p=0.2                                   |
| DeepShift (large)       | 622KiB | 54.1%  | 0.9% | 12m        | H=331, p=0.2                                   |

Table 10: Extend results for SoonWiSARD, BTHOWeN, Diff Logic Net, FINN, and DeepShift on the KWS Dataset.

| KWS                     | Size   | Acc.  | Std  | Time Train | Hyperparameters                               |
|-------------------------|--------|-------|------|------------|-----------------------------------------------|
| SoonWiSARD (small)      | 23KiB  | 58.2% | 1.6% | 4m         | n=6, K=2, L=4, H=47104, p=0.5, $\tau=1/0.03$  |
| SoonWiSARD (medium)     | 46KiB  | 67.7% | 1.1% | 4m         | n=6, K=2, L=4, H=94208, p=0.5, $\tau=1/0.01$  |
| SoonWiSARD (large)      | 92KiB  | 69.6% | 0.8% | 4m         | n=6, K=2, L=4, H=188416, p=0.5, $\tau=1/0.01$ |
| BTHOWeN (small)         | 15KiB  | 39.6% | 0.0% | -          | n=6, K=2, L=64, H=1920                        |
| BTHOWeN (medium)        | 53KiB  | 44.7% | 0.0% | -          | n=6, K=2, L=64, H=6784                        |
| BTHOWeN (large)         | 183KiB | 48.3% | 0.0% | -          | n=10, K=2, L=512, H=2928                      |
| Diff Logic Net (small)  | 23KiB  | 57.3% | 2.0% | 3m         | H=48000, p=0.0, $\tau=1/0.03$                 |
| Diff Logic Net (medium) | 46KiB  | 63.3% | 1.0% | 4m         | H=95000, p=0.0, $\tau=1/0.03$                 |
| Diff Logic Net (large)  | 92KiB  | 63.7% | 0.9% | 8m         | H=188000, p=0.0, $\tau=1/0.03$                |
| FINN (small)            | 23KiB  | 47.2% | 1.8% | 8m         | H=346, p=0.2                                  |
| FINN (medium)           | 46KiB  | 53.3% | 2.5% | 8m         | H=692, p=0.2                                  |
| FINN (large)            | 92KiB  | 55.9% | 1.4% | 8m         | H=1384, p=0.2                                 |
| DeepShift (small)       | 23KiB  | 18.6% | 5.5% | 4m         | H=69, p=0.2                                   |
| DeepShift (medium)      | 46KiB  | 22.2% | 2.5% | 4m         | H=137, p=0.2                                  |
| DeepShift (large)       | 92KiB  | 24.9% | 4.4% | 4m         | H=274, p=0.2                                  |

Table 11: Extend results for SoonWiSARD, BTHOWeN, Diff Logic Net, FINN, and DeepShift on the ToyADMOS Dataset.

| ToyADMOS                | Size  | Acc.  | Std | Time Train | Hyperparameters                               |
|-------------------------|-------|-------|-----|------------|-----------------------------------------------|
| SoonWiSARD (small)      | 7KiB  | 88.4% |     | 48m        | n=6, K=1, L=16, H=3840, p=0.5, $\tau=1/0.03$  |
| SoonWiSARD (medium)     | 15KiB | 89.3% |     | 48m        | n=6, K=1, L=16, H=7680, p=0.5, $\tau=1/0.03$  |
| SoonWiSARD (large)      | 30KiB | 90.5% |     | 48m        | n=6, K=1, L=16, H=15360, p=0.5, $\tau=1/0.03$ |
| BTHOWeN (small)         | 8KiB  | 72.3% |     | -          | n=6, K=2, L=64, H=1700                        |
| BTHOWeN (medium)        | 13KiB | 73.3% |     | -          | n=6, K=2, L=64, H=2780                        |
| BTHOWeN (large)         | 80KiB | 74.1% |     | -          | n=10, K=2, L=1024, H=640                      |
| Diff Logic Net (small)  | 7KiB  | 88.3% |     | 52m        | H=15000, p=0.0, $\tau=1/0.03$                 |
| Diff Logic Net (medium) | 15KiB | 89.2% |     | 52m        | H=31000, p=0.0, $\tau=1/0.03$                 |
| Diff Logic Net (large)  | 30KiB | 89.4% |     | 56m        | H=62000, p=0.0, $\tau=1/0.03$                 |
| FINN (small)            | 7KiB  | 84.8% |     | 64m        | H=90, p=0.2                                   |
| FINN (medium)           | 15KiB | 85.9% |     | 64m        | H=190, p=0.2                                  |
| FINN (large)            | 30KiB | 86.6% |     | 64m        | H=380, p=0.2                                  |
| DeepShift (small)       | 7KiB  | 57.8% |     | 88m        | H=18, p=0.2                                   |
| DeepShift (medium)      | 15KiB | 57.8% |     | 88m        | H=38, p=0.2                                   |
| DeepShift (large)       | 30KiB | 57.9% |     | 88m        | H=76, p=0.2                                   |

Table 12: Extend results for SoonWiSARD, BTHOWeN, Diff Logic Net, FINN, and DeepShift on the VWW Dataset.

| VWW                     | Size   | Acc.  | Std  | Time Train | Hyperparameters                                |
|-------------------------|--------|-------|------|------------|------------------------------------------------|
| SoonWiSARD (small)      | 12KiB  | 57.9% | 1.5% | 12m        | n=6, K=1, L=16, H=6144, p=0.5, $\tau=1/0.03$   |
| SoonWiSARD (medium)     | 120KiB | 59.8% | 0.9% | 16m        | n=6, K=1, L=16, H=61440, p=0.5, $\tau=1/0.03$  |
| SoonWiSARD (large)      | 240KiB | 60.6% | 1.1% | 20m        | n=6, K=1, L=16, H=122880, p=0.5, $\tau=1/0.03$ |
| BTHOWeN (small)         | 12KiB  | 57.3% | 0.0% | -          | n=6, K=2, L=64, H=1536                         |
| BTHOWeN (medium)        | 120KiB | 58.4% | 0.0% | -          | n=10, K=2, L=1024, H=960                       |
| BTHOWeN (large)         | 240KiB | 59.3% | 0.0% | -          | n=10, K=2, L=2048, H=960                       |
| Diff Logic Net (small)  | 20KiB  | 52.6% | 1.6% | 20m        | H=40960, p=0.0, $\tau=1/0.03$                  |
| Diff Logic Net (medium) | 120KiB | 55.4% | 1.4% | 32m        | H=245760, p=0.0, $\tau=1/0.03$                 |
| Diff Logic Net (large)  | 250KiB | 55.7% | 1.3% | 56m        | H=512000, p=0.0, $\tau=1/0.03$                 |
| FINN (small)            | 20KiB  | 51.7% | 1.5% | 24m        | H=17, p=0.2                                    |
| FINN (medium)           | 120KiB | 52.1% | 1.1% | 24m        | H=106, p=0.2                                   |
| FINN (large)            | 250KiB | 52.3% | 1.2% | 24m        | H=222, p=0.2                                   |
| DeepShift (small)       | 20KiB  | 52.9% | 1.2% | 16m        | H=3, p=0.2                                     |
| DeepShift (medium)      | 120KiB | 53.8% | 0.9% | 16m        | H=21, p=0.2                                    |
| DeepShift (large)       | 250KiB | 54.6% | 0.8% | 16m        | H=44, p=0.2                                    |
